# Supplementary material
Source: PubMed Central journal article supplement (PMC5337400)
Supplement: NIHMS70884-supplement-Tables.pdf [file NIHMS70884-supplement-Tables.pdf]

**Supplementary Table 1: Silencing classes for informative and well-expressed X-linked genes in BC and CB crosses.**

Silencing classes for the 173 informative and well-expressed X-linked genes in BC and/or CB crosses.

| All genes       |       |       | All genes       |       |       | Consistent genes |       |       |       |
|-----------------|-------|-------|-----------------|-------|-------|------------------|-------|-------|-------|
| Genes           | BC    | CB    | Genes           | BC    | CB    | Genes            | BC    | CB    | All   |
| 1110012L19Rik   | Early | Early | <i>Mdr1</i>     | Late  | NA    | 1110012L19Rik    | Early | Early | Early |
| 1810030O07Rik   | NA    | Esc   | <i>Med12</i>    | Early | NA    | <i>Acsl4</i>     | Late  | Inter | Late  |
| A230072C01Rik   | NA    | Late  | <i>Med14</i>    | Late  | Esc   | <i>Alg13</i>     | Bias  | Bias  | Bias  |
| <i>Abcb7</i>    | Early | Late  | <i>Mmgt1</i>    | Late  | Esc   | <i>Amot</i>      | Late  | Bias  | Late  |
| <i>Abcd1</i>    | Esc   | NA    | <i>Mospd1</i>   | Late  | Late  | <i>Apex2</i>     | Inter | Late  | Inter |
| <i>Acof9</i>    | Late  | Early | <i>Mpp1</i>     | Late  | Esc   | <i>Apoo</i>      | Inter | Late  | Inter |
| <i>Acsl4</i>    | Late  | Inter | <i>Msl3</i>     | Esc   | Esc   | <i>Araf</i>      | Esc   | Bias  | Esc   |
| <i>Alg13</i>    | Bias  | Bias  | <i>Mtm1</i>     | Early | NA    | <i>Atp6ap2</i>   | Esc   | Esc   | Esc   |
| <i>Amot</i>     | Late  | Bias  | <i>Naa10</i>    | Bias  | Bias  | <i>Atrx</i>      | Inter | Early | Inter |
| <i>Apex2</i>    | Inter | Late  | <i>Ndufb11</i>  | Bias  | Esc   | <i>Bcap31</i>    | Inter | Late  | Bias  |
| <i>Apoo</i>     | Inter | Late  | <i>Nkap</i>     | Esc   | Bias  | <i>Brwd3</i>     | Late  | Late  | Late  |
| <i>Araf</i>     | Esc   | Bias  | <i>Nono</i>     | Inter | Late  | <i>Cdk16</i>     | Late  | Late  | Late  |
| <i>Atp11c</i>   | Inter | NA    | <i>Nsdhl</i>    | NA    | Inter | <i>Cul4b</i>     | Late  | Bias  | Bias  |
| <i>Atp6ap2</i>  | Esc   | Esc   | <i>Ocr1</i>     | Inter | Early | <i>Dkc1</i>      | Bias  | Bias  | Bias  |
| <i>Atp7a</i>    | Early | NA    | <i>Odf1</i>     | Bias  | Early | <i>Ebp</i>       | Late  | Bias  | Late  |
| <i>Atrx</i>     | Inter | Early | <i>Ogt</i>      | Esc   | Bias  | <i>Eda</i>       | Late  | Late  | Late  |
| BC065397        | NA    | Late  | <i>Otud5</i>    | Bias  | Late  | <i>Eif2s3x</i>   | Bias  | Esc   | Esc   |
| <i>Bcap31</i>   | Inter | Late  | <i>Pbdc1</i>    | Esc   | Esc   | <i>Eif4</i>      | Late  | Late  | Late  |
| <i>Bex1</i>     | NA    | Late  | <i>Pcyt1b</i>   | Late  | Late  | <i>Fancb</i>     | Late  | Late  | Late  |
| <i>Bhlhb9</i>   | NA    | Late  | <i>Pdha1</i>    | Bias  | Esc   | <i>Fthl17f</i>   | Late  | Late  | Late  |
| <i>Brc3</i>     | NA    | Inter | <i>Pdzd11</i>   | Inter | Inter | <i>G6pdx</i>     | Inter | Late  | Inter |
| <i>Brwd3</i>    | Late  | Late  | <i>Pgk1</i>     | Inter | NA    | <i>Gata1</i>     | Late  | Late  | Late  |
| <i>Ccdc22</i>   | Late  | NA    | <i>Pgrmc1</i>   | Late  | Late  | <i>Gla</i>       | Inter | Inter | Inter |
| <i>Cdk16</i>    | Late  | Late  | <i>Phf6</i>     | Late  | NA    | <i>Gnl3l</i>     | Inter | Early | Late  |
| <i>Cenpi</i>    | Late  | NA    | <i>Phf8</i>     | Late  | Late  | <i>Gpkow</i>     | Late  | Late  | Late  |
| <i>Cetn2</i>    | Late  | NA    | <i>Pim2</i>     | Late  | Late  | <i>Hccs</i>      | Bias  | Bias  | Bias  |
| <i>Cited1</i>   | Bias  | Inter | <i>Plp2</i>     | Late  | Late  | <i>Hdac6</i>     | Late  | Late  | Late  |
| <i>Ctps2</i>    | Bias  | NA    | <i>Pls3</i>     | Inter | NA    | <i>Hmgn5</i>     | Inter | Early | Inter |
| <i>Cul4b</i>    | Late  | Bias  | <i>Pnma5</i>    | Early | Early | <i>Hsd17b10</i>  | Late  | Inter | Late  |
| <i>Ddx3x</i>    | Esc   | Late  | <i>Pola1</i>    | Late  | Late  | <i>Htatsf1</i>   | Late  | Late  | Late  |
| <i>Dkc1</i>     | Bias  | Bias  | <i>Porcn</i>    | Inter | Late  | <i>Huwe1</i>     | Bias  | Late  | Bias  |
| <i>Dlg3</i>     | Early | NA    | <i>Pqbp1</i>    | Bias  | Late  | <i>Idh3g</i>     | Esc   | Bias  | Bias  |
| <i>Ebp</i>      | Late  | Bias  | <i>Praf2</i>    | Late  | Bias  | <i>Ids</i>       | Late  | Late  | Late  |
| <i>Eda</i>      | Late  | Late  | <i>Prdx4</i>    | Inter | Esc   | <i>Jade3</i>     | Late  | Late  | Late  |
| <i>Eif1ax</i>   | Late  | Esc   | <i>Prps1</i>    | Bias  | Bias  | <i>Kdm5c</i>     | Esc   | Esc   | Esc   |
| <i>Eif2s3x</i>  | Bias  | Esc   | <i>Psmd10</i>   | Early | Late  | <i>Kdm6a</i>     | Late  | Bias  | Bias  |
| <i>Eif4</i>     | Late  | Late  | <i>Rab9</i>     | Bias  | Early | <i>Kif4</i>      | Early | Early | Early |
| <i>Emd</i>      | Early | NA    | <i>Rbm3</i>     | Esc   | Bias  | <i>Lage3</i>     | Inter | Late  | Bias  |
| <i>Eras</i>     | Early | NA    | <i>Rbm3</i>     | Early | Early | <i>Lamp2</i>     | Esc   | Bias  | Bias  |
| <i>Ercc6l</i>   | Early | Late  | <i>Rbm3</i>     | Late  | Late  | <i>Las1l</i>     | Inter | Early | Early |
| <i>Fam3a</i>    | Early | Late  | <i>Renbp</i>    | Esc   | Late  | <i>Magt1</i>     | Early | Inter | Early |
| <i>Fam50a</i>   | Esc   | Early | <i>Rgn</i>      | Late  | Late  | <i>Map7d2</i>    | Inter | Late  | Late  |
| <i>Fancb</i>    | Late  | Late  | <i>Ribc1</i>    | Early | NA    | <i>Mbtps2</i>    | Esc   | Bias  | Esc   |
| <i>Flna</i>     | Early | NA    | <i>Rlim</i>     | Early | Early | <i>Mospd1</i>    | Late  | Late  | Late  |
| <i>Fmr1</i>     | Late  | NA    | <i>Rpgr</i>     | NA    | Late  | <i>Msl3</i>      | Esc   | Esc   | Esc   |
| <i>Fmr1nb</i>   | Early | NA    | <i>Rpl10</i>    | Inter | NA    | <i>Naa10</i>     | Bias  | Bias  | Bias  |
| <i>Fthl17f</i>  | Late  | Late  | <i>Sat1</i>     | Inter | Bias  | <i>Ndufb11</i>   | Bias  | Esc   | Bias  |
| <i>Ftj1</i>     | Esc   | Late  | <i>Sic25a14</i> | Early | Late  | <i>Nkap</i>      | Esc   | Bias  | Bias  |
| <i>Fundc1</i>   | Esc   | NA    | <i>Sic25a53</i> | Early | NA    | <i>Nono</i>      | Inter | Late  | Inter |
| <i>G6pdx</i>    | Inter | Late  | <i>Sic35a2</i>  | Late  | Early | <i>Ocr1</i>      | Inter | Early | Late  |
| <i>Gata1</i>    | Late  | Late  | <i>Sic6a8</i>   | Inter | Late  | <i>Ogt</i>       | Esc   | Bias  | Esc   |
| <i>Gdi1</i>     | Esc   | NA    | <i>Smc1a</i>    | Inter | Bias  | <i>Otud5</i>     | Bias  | Late  | Late  |
| <i>Gemin8</i>   | Early | Esc   | <i>Sms</i>      | Esc   | Esc   | <i>Pbdc1</i>     | Esc   | Esc   | Esc   |
| <i>Gla</i>      | Inter | Inter | <i>Snx12</i>    | Early | NA    | <i>Pcyt1b</i>    | Late  | Late  | Late  |
| <i>Gm6880</i>   | Early | NA    | <i>Suv39h1</i>  | Esc   | Esc   | <i>Pdha1</i>     | Bias  | Esc   | Esc   |
| <i>Gnl3l</i>    | Inter | Early | <i>Syap1</i>    | Esc   | Esc   | <i>Pdzd11</i>    | Inter | Inter | Inter |
| <i>Gpc4</i>     | Early | NA    | <i>Tab3</i>     | Late  | Inter | <i>Pgrmc1</i>    | Late  | Late  | Late  |
| <i>Gpkow</i>    | Late  | Late  | <i>Taf1</i>     | Late  | NA    | <i>Phf8</i>      | Late  | Late  | Late  |
| <i>Gspt2</i>    | Inter | NA    | <i>Taz</i>      | Early | Late  | <i>Pim2</i>      | Late  | Late  | Late  |
| <i>Haus7</i>    | Early | NA    | <i>Tbc1d25</i>  | Esc   | Bias  | <i>Plp2</i>      | Late  | Late  | Late  |
| <i>Hccs</i>     | Bias  | Bias  | <i>Tfe3</i>     | Late  | Bias  | <i>Pnma5</i>     | Early | Early | Early |
| <i>Hcfc1</i>    | Bias  | Early | <i>Timm17b</i>  | Bias  | Bias  | <i>Pola1</i>     | Late  | Late  | Late  |
| <i>Hdac6</i>    | Late  | Late  | <i>Tkt1l</i>    | Early | Early | <i>Porcn</i>     | Inter | Late  | Esc   |
| <i>Hmgb3</i>    | Late  | Early | <i>Tmem164</i>  | Late  | NA    | <i>Pqbp1</i>     | Bias  | Late  | Late  |
| <i>Hmgn5</i>    | Inter | Early | <i>Tmem185a</i> | Late  | NA    | <i>Praf2</i>     | Late  | Bias  | Late  |
| <i>Hprt</i>     | Inter | Bias  | <i>Trap1a</i>   | Early | Esc   | <i>Prps1</i>     | Bias  | Bias  | Bias  |
| <i>Hsd17b10</i> | Late  | Inter | <i>Tsr2</i>     | Bias  | Late  | <i>Rbm3</i>      | Esc   | Bias  | Bias  |
| <i>Htatsf1</i>  | Late  | Late  | <i>Txlng</i>    | Bias  | Late  | <i>Rbm3</i>      | Early | Early | Early |
| <i>Huwe1</i>    | Bias  | Late  | <i>Uba1</i>     | Esc   | Bias  | <i>Rbm3</i>      | Late  | Late  | Late  |
| <i>Idh3g</i>    | Esc   | Bias  | <i>Ubl4a</i>    | Late  | Late  | <i>Rgn</i>       | Late  | Late  | Late  |
| <i>Ids</i>      | Late  | Late  | <i>Usp9x</i>    | Esc   | Late  | <i>Rlim</i>      | Early | Early | Early |
| <i>Igbb1</i>    | Esc   | Late  | <i>Utp14a</i>   | Esc   | Bias  | <i>Sic6a8</i>    | Inter | Late  | Late  |
| <i>Ikbkg</i>    | Late  | Esc   | <i>Uxt</i>      | Late  | Esc   | <i>Sms</i>       | Esc   | Esc   | Esc   |
| <i>Ii2rg</i>    | Late  | NA    | <i>Vbp1</i>     | Inter | Bias  | <i>Suv39h1</i>   | Esc   | Esc   | Esc   |
| <i>Irak1</i>    | Inter | NA    | <i>Vma21</i>    | NA    | Late  | <i>Syap1</i>     | Esc   | Esc   | Esc   |
| <i>Jade3</i>    | Late  | Late  | <i>Wdr13</i>    | Bias  | Late  | <i>Tab3</i>      | Late  | Inter | Inter |
| <i>Kdm5c</i>    | Esc   | Esc   | <i>Wdr45</i>    | Late  | Bias  | <i>Tbc1d25</i>   | Esc   | Bias  | Bias  |
| <i>Kdm6a</i>    | Late  | Bias  | <i>Wnk3</i>     | Late  | NA    | <i>Tfe3</i>      | Late  | Bias  | Late  |
| <i>Kif4</i>     | Early | Early | <i>Xiap</i>     | Late  | Bias  | <i>Timm17b</i>   | Bias  | Bias  | Bias  |
| <i>Kif8</i>     | Inter | NA    | <i>Xist</i>     | Esc   | Esc   | <i>Tkt1l</i>     | Early | Early | Early |
| <i>Kihl15</i>   | Late  | NA    | <i>Yipf6</i>    | Early | Bias  | <i>Tsr2</i>      | Bias  | Late  | Bias  |
| <i>Lage3</i>    | Late  | Inter | <i>Zfx</i>      | Early | Late  | <i>Txlng</i>     | Bias  | Late  | Late  |
| <i>Lamp2</i>    | Esc   | Bias  | <i>Zmym3</i>    | Late  | Early | <i>Uba1</i>      | Esc   | Bias  | Esc   |
| <i>Las1l</i>    | Inter | Early | <i>Zrsr2</i>    | Early | Bias  | <i>Ubl4a</i>     | Late  | Late  | Late  |
| <i>Magea5</i>   | Late  | NA    |                 |       |       | <i>Utp14a</i>    | Esc   | Bias  | Esc   |
| <i>Maged1</i>   | Early | NA    |                 |       |       | <i>Wdr13</i>     | Bias  | Late  | Bias  |
| <i>Magt1</i>    | Early | Inter |                 |       |       | <i>Wdr45</i>     | Late  | Bias  | Bias  |
| <i>Map7d2</i>   | Inter | Late  |                 |       |       | <i>Xiap</i>      | Late  | Bias  | Bias  |
| <i>Mbtps2</i>   | Esc   | Bias  |                 |       |       | <i>Xist</i>      | Esc   | Esc   | Esc   |

**Supplementary Table 2: Summary of escapees and their status in other studies**

Information for escapees is provided for CB and BC crosses. Status of each escapee gene has been evaluated in other studies using hybrid cell lines or tissues (Calabrese *et al*, *Cell*, 2012; Berletch *et al*, *PLOS Genet*, 2015; Marks *et al*, *Genome Biol*, 2015; Gendrel *et al*, *Dev Cell*, 2014)

| Gene Symbol   | BC embryos | CB embryos | TSC<br>(Calabrese et al) | Brain<br>(Berletch et al) | Spleen<br>(Berletch et al) | Ovary<br>(Berletch et al) | Patski<br>(Berletch et al) | NPC*<br>(Marks et al) | NPC**<br>(Gendrel et al) |
|---------------|------------|------------|--------------------------|---------------------------|----------------------------|---------------------------|----------------------------|-----------------------|--------------------------|
| 1810030O07Rik | -          | yes        | no                       |                           |                            | yes                       | yes                        | yes (1/3)             | yes (4/4)                |
| Abcd1         | yes        | no         | no                       |                           |                            |                           |                            | -                     | yes (2/4)                |
| Alg13         | biased     | biased     | -                        |                           |                            | yes                       |                            | no                    | yes (1/4)                |
| Amot          | no         | biased     | no                       |                           |                            |                           | yes                        | no                    | no                       |
| Araf          | yes        | biased     | no                       |                           |                            |                           |                            | yes (1/3)             | yes (4/4)                |
| Atp6ap2       | yes        | yes        | -                        |                           |                            |                           |                            | no                    | yes (2/4)                |
| Cited         | biased     | no         | no                       |                           |                            |                           |                            | -                     | no                       |
| Ctsp2         | biased     | -          | no                       |                           |                            |                           | yes                        | no                    | yes (3/4)                |
| Cul4b         | no         | biased     | no                       |                           |                            |                           |                            | -                     | -                        |
| Ddx3x         | yes        | no         | no                       | yes                       | yes                        | yes                       | yes                        | yes (3/3)             | yes (4/4)                |
| Dkc1          | biased     | biased     | no                       |                           |                            |                           |                            | yes                   | no                       |
| Ebp           | no         | biased     | no                       |                           |                            |                           | yes                        | yes (1/3)             | yes (2/4)                |
| Eif1ax        | no         | yes        | -                        |                           |                            |                           |                            | no                    | yes (2/4)                |
| Eif2s3x       | biased     | yes        | yes                      | yes                       | yes                        | yes                       | yes                        | -                     | yes (4/4)                |
| Fam50a        | yes        | no         | -                        |                           |                            |                           | yes                        | -                     | yes (2/4)                |
| Ftsj1         | yes        | no         | no                       |                           |                            |                           |                            | yes (2/3)             | yes (4/4)                |
| Fundc1        | yes        | -          | no                       |                           |                            |                           |                            | no                    | yes (2/4)                |
| Gdi1          | yes        | -          | no                       | yes                       |                            |                           |                            | no                    | yes (2/4)                |
| Gemin8        | no         | yes        | no                       |                           |                            |                           |                            | -                     | yes (4/4)                |
| Hccs          | biased     | biased     | no                       |                           |                            |                           |                            | no                    | yes (3/4)                |
| Hcfc1         | biased     | no         | no                       |                           |                            |                           |                            | yes (2/3)             | yes (4/4)                |
| Hprt          | no         | biased     | no                       |                           |                            |                           |                            | no                    | no                       |
| Huwe1         | biased     | no         | no                       |                           |                            | yes                       |                            | no                    | yes (3/4)                |
| Idh3g         | yes        | biased     | no                       |                           |                            | yes                       | yes                        | no                    | yes (2/4)                |
| Igfbp1        | yes        | no         | no                       |                           |                            |                           |                            | no                    | yes (3/4)                |
| Ikbkg         | no         | yes        | no                       |                           |                            |                           | yes                        | no                    | yes (1/4)                |
| Kdm5c         | yes        | yes        | yes                      | yes                       | yes                        | yes                       | yes                        | yes (3/3)             | yes (4/4)                |
| Kdm6a         | no         | biased     | yes                      | yes                       | yes                        | yes                       | yes                        | yes (3/3)             | yes (4/4)                |
| Lamp2         | yes        | biased     | no                       |                           |                            | yes                       | yes                        | no                    | yes (1/4)                |
| Mbtps2        | yes        | biased     | no                       |                           |                            |                           |                            | no                    | yes (1/4)                |
| Med14         | no         | yes        | no                       |                           |                            |                           |                            | yes (2/3)             | yes (4/4)                |
| Mmgt1         | no         | yes        | -                        |                           |                            | yes                       |                            | -                     | yes (2/4)                |
| Mpp1          | no         | yes        | no                       |                           |                            |                           |                            | no                    | no                       |
| Msl3          | yes        | yes        | no                       |                           |                            |                           |                            | no                    | yes (2/4)                |
| Naa10         | biased     | biased     | -                        |                           |                            |                           |                            | -                     | yes (2/4)                |
| Ndufb11       | biased     | yes        | no                       |                           |                            |                           |                            | yes (1/3)             | yes (4/4)                |
| Nkap          | yes        | biased     | yes CB only              |                           |                            |                           |                            | yes (2/3)***          | yes (3/4)                |
| Ofd1          | biased     | no         | no                       |                           |                            |                           | yes                        | yes (2/3)             | yes (3/4)                |
| Ogt           | yes        | biased     | yes                      |                           |                            |                           |                            | no                    | yes (4/4)                |
| Pbdc1         | yes        | yes        | -                        |                           | yes                        | yes                       | yes                        | -                     | yes (4/4)                |
| Pdha1         | biased     | yes        | no                       |                           |                            | yes                       |                            | no                    | no                       |
| Pqbp1         | biased     | no         | yes BC only              |                           |                            |                           |                            | no                    | yes (3/4)                |
| Praf2         | no         | biased     | -                        |                           |                            |                           |                            | -                     | yes (3/4)                |
| Prdx4         | no         | yes        | no                       |                           |                            |                           |                            | no                    | no                       |
| Prps1         | biased     | biased     | no                       |                           |                            |                           |                            | no                    | no                       |
| Rab9          | biased     | no         | no                       |                           |                            |                           |                            | no                    | yes (3/4)                |
| Rbm3          | yes        | biased     | no                       |                           |                            |                           |                            | yes (1/3)             | yes (2/4)                |
| Renbp         | yes        | no         | no                       |                           |                            |                           |                            | no                    | yes (2/4)                |
| Sat1          | no         | biased     | no                       |                           |                            |                           |                            | no                    | no                       |
| Smc1a         | no         | biased     | no                       |                           |                            |                           |                            | no                    | yes (3/4)                |
| Sms           | yes        | yes        | no                       |                           |                            |                           |                            | no                    | no                       |
| Suv39h1       | yes        | yes        | yes BC only              |                           |                            |                           |                            | no                    | yes (4/4)                |
| Syap1         | yes        | yes        | yes CB only              |                           |                            |                           |                            | no                    | yes (3/4)                |
| Tbc1d25       | yes        | biased     | no                       |                           |                            |                           |                            | yes (1/3)             | yes (2/4)                |
| Tfe3          | no         | biased     | no                       |                           |                            |                           |                            | -                     | -                        |
| Timm17b       | biased     | biased     | no                       |                           |                            |                           |                            | yes (2/3)             | yes (3/4)                |
| Trap1a        | no         | yes        | no                       |                           |                            |                           |                            | -                     | -                        |
| Tsr2          | biased     | no         | no                       |                           |                            |                           |                            | no                    | no                       |
| Txlng         | biased     | no         | no                       |                           |                            |                           |                            | yes (1/3)             | yes (3/4)                |
| Uba1a         | yes        | biased     | -                        |                           |                            | yes                       |                            | yes (2/3)             | yes (4/4)                |
| Usp9x         | yes        | no         | no                       |                           |                            | yes                       |                            | yes (2/3)             | yes (3/4)                |
| Utp14a        | yes        | biased     | yes                      |                           | yes                        | yes                       |                            | yes (3/3)             | yes (4/4)                |
| Uxt           | no         | yes        | no                       |                           |                            |                           |                            | -                     | yes (1/4)                |
| Vbp1          | no         | biased     | no                       |                           |                            |                           | yes                        | yes (2/3)             | yes (2/4)                |
| Wdr13         | biased     | no         | no                       |                           |                            |                           | yes                        | yes (1/3)             | yes (3/4)                |
| Wdr45         | no         | biased     | no                       |                           |                            |                           |                            | yes (1/3)             | yes (3/4)                |
| Xiap          | no         | biased     | -                        |                           |                            |                           |                            | no                    | no                       |
| Xist          | yes        | yes        | yes                      | yes                       | yes                        | yes                       | yes                        | yes (3/3)             | yes (4/4)                |
| Yipf6         | no         | yes        | yes                      |                           |                            |                           | yes                        | no                    | yes (1/4)                |
| Zrsr2         | no         | biased     | yes                      |                           |                            |                           |                            | yes (1/3)             | yes (3/4)                |

\* NPC data are derived from 3 independent clones. Information of escape for each clone is provided in brackets.

\*\* NPC data are derived from 4 independent clones. Information of escape for each clone is provided in brackets.

\*\*\* *Nkap* escapes from Cast Xi and from 129 Xi.
